# Supplementary material
Source: Research Square preprint supplement (doi:10.21203/rs.3.rs-9782410/v1)
Supplement: Supplementary file 1 [file a3194e3316906684b1e7ef56.docx]

**Additional file 1: Supplementary materials**

# Supplementary Table 1 DeLong test results for AUC comparisons among the three models

| **Model comparison** | **AUC 1** | **AUC 2** | **Z value** | **P value** |
| --- | --- | --- | --- | --- |
| Combined model vs Clinicopathological model | 0.910 | 0.880 | 2.270 | 0.023 |
| Combined model vs Imaging-report model | 0.910 | 0.703 | 5.141 | <0.001 |
| Clinicopathological model vs Imaging-report model | 0.880 | 0.703 | 3.624 | <0.001 |

Abbreviations: AUC, area under the curve; pCR, pathological complete response; MRI, magnetic resonance imaging.

# Supplementary Figure 1 Overall Hallmark GSEA ridgeplot of pCR versus non-pCR in GSE194040


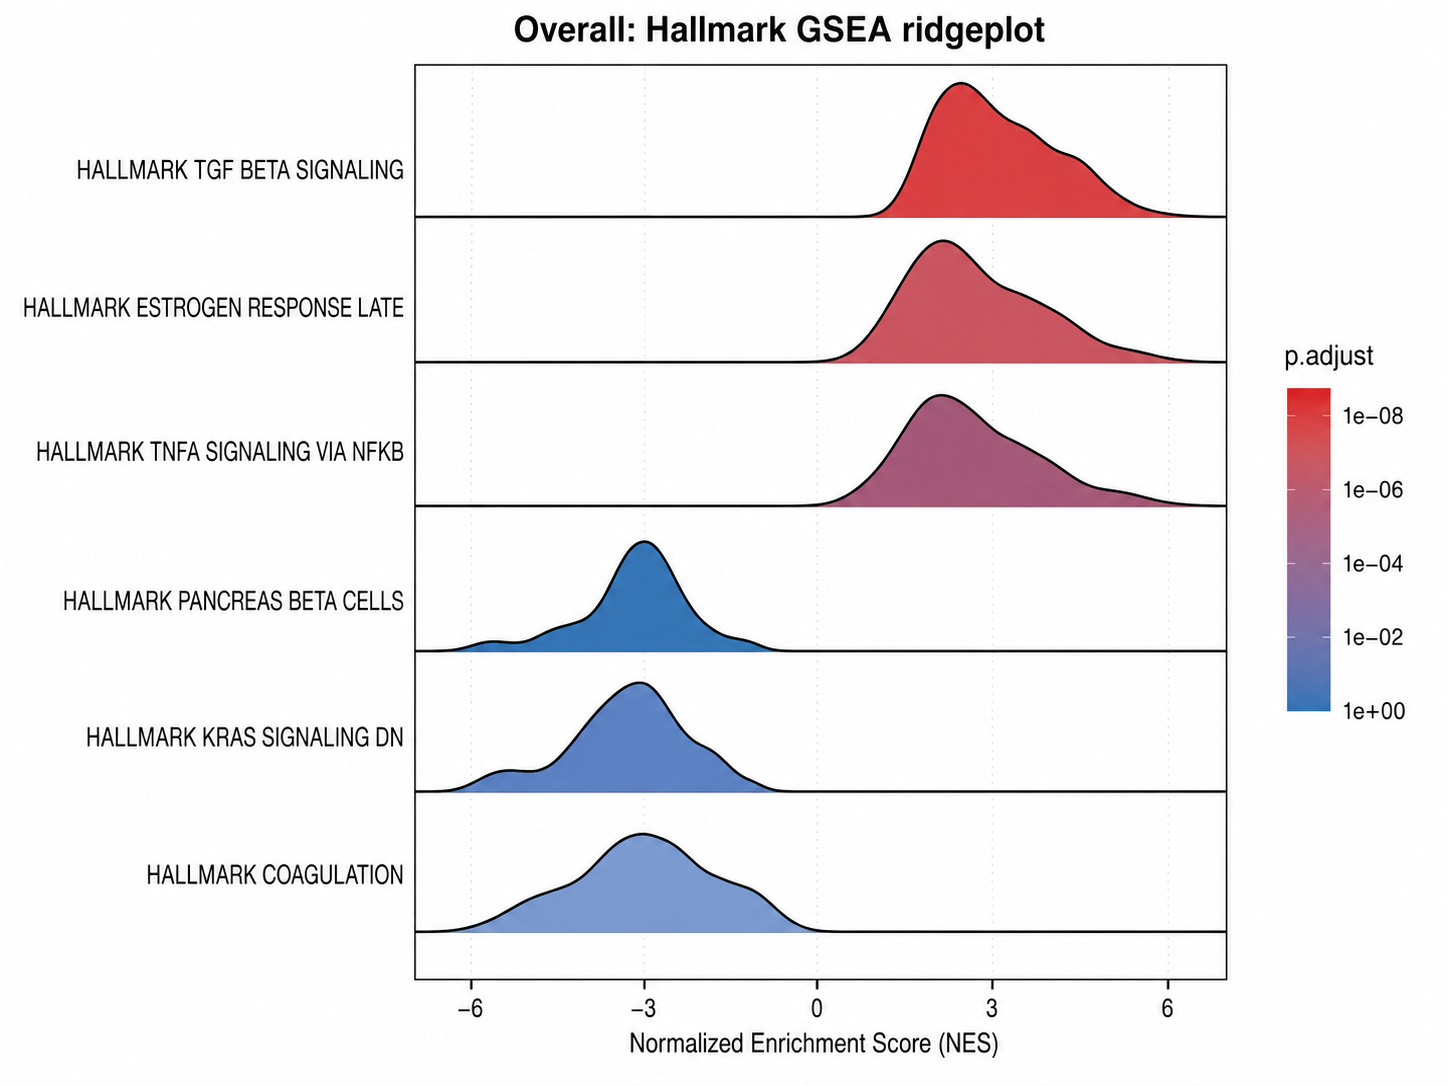


Each ridgeline represents the distribution of a significantly enriched Hallmark pathway between the pCR and non-pCR groups. Color indicates the adjusted P value (p.adjust), and the x-axis represents the normalized enrichment score (NES). pCR, pathological complete response; GSEA, gene set enrichment analysis; NES, normalized enrichment score.

# Supplementary Figure 2 Subgroup Hallmark GSEA ridgeplots of pCR versus non-pCR in GSE194040


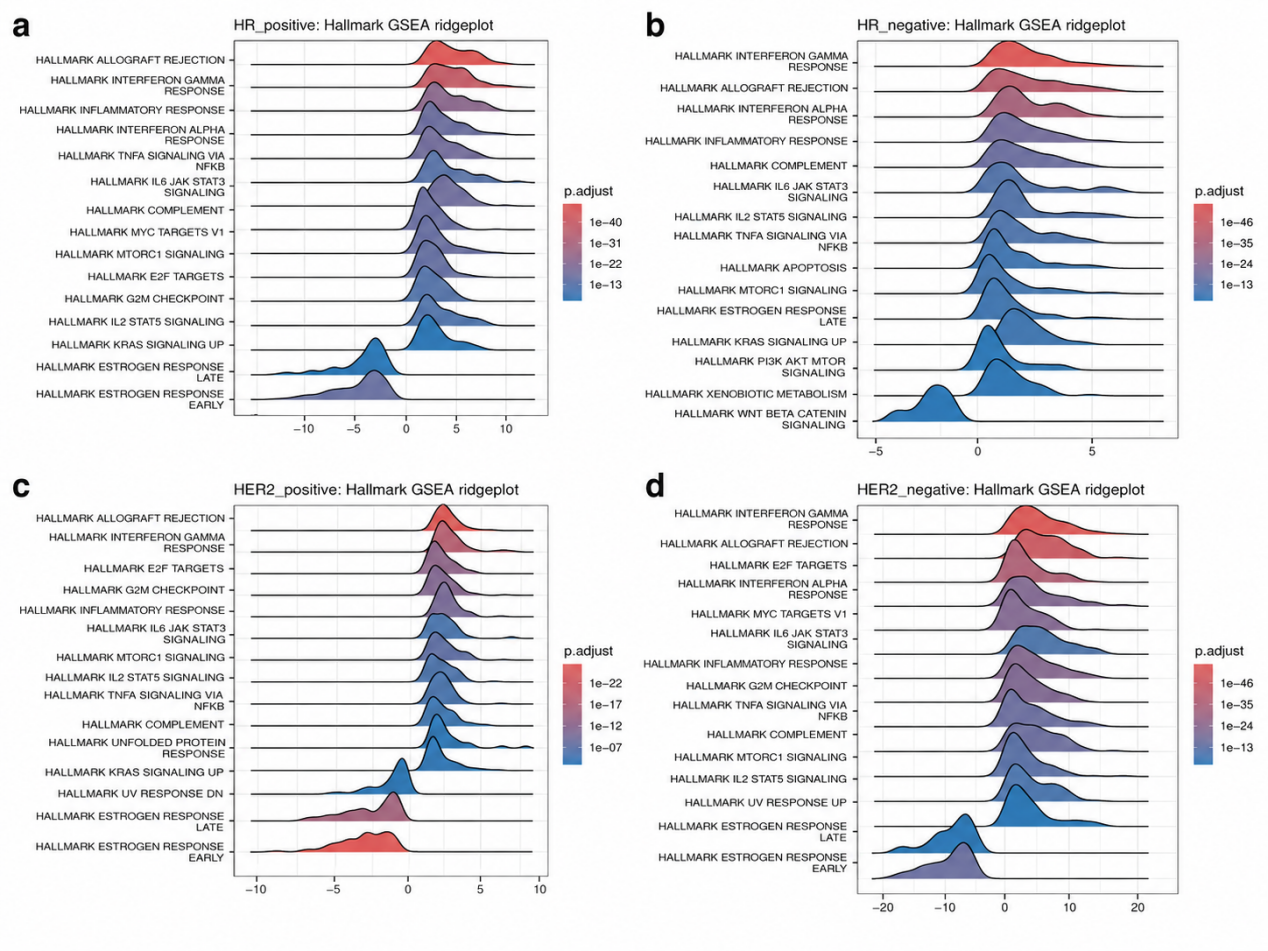


a HR-positive subgroup; b HR-negative subgroup; c HER2-positive subgroup; d HER2-negative subgroup. Ridgeplots show the distribution of ranked genes in enriched Hallmark pathways within each subgroup. The color gradient represents the adjusted P value. pCR, pathological complete response; GSEA, gene set enrichment analysis; HR, hormone receptor; HER2, human epidermal growth factor receptor 2.
